# Supplementary material for: Adjuvant Chemoradiotherapy Associated with Improved Overall Survival in Resected Esophageal Squamous Cell Carcinoma after Neoadjuvant Chemoradiotherapy in Intensity-Modulated Radiotherapy Era
Source: MDPI journal article supplement (doi:10.3390/biomedicines10112989), 2022-11-21
Supplement: s1 [file s1]

**Supplemental Table S1.** Patient Characteristics in the Matched Pairs.

| <b>Characteristics</b>                                        | <b>Consolidative<br/>CCRT<br/>(n = 35)</b> | <b>Observation<br/>(n = 35)</b> | <b>P-value</b> |
|---------------------------------------------------------------|--------------------------------------------|---------------------------------|----------------|
| Age, years                                                    |                                            |                                 | .339           |
| Median (IQR)                                                  | 51.0 (46.0 – 56.0)                         | 54.0 (52.0 – 62.0)              |                |
| Male Sex, n (%)                                               | 35 (100%)                                  | 34 (97.1%)                      | 1.000          |
| ECOG Performance Status, n (%)                                |                                            |                                 | .513           |
| 0                                                             | 7 (20.0%)                                  | 4 (11.4%)                       |                |
| 1                                                             | 28 (80.0%)                                 | 31 (88.6%)                      |                |
| Initial Tumor Length, cm                                      |                                            |                                 | 1.000          |
| Median (IQR)                                                  | 6.0 (5.0-7.2)                              | 5.4 (4.0-7.1)                   |                |
| Tumor Location, n(%)                                          |                                            |                                 | .871           |
| Upper                                                         | 6 (17.1%)                                  | 6 (17.1%)                       |                |
| Middle                                                        | 15 (42.9%)                                 | 13 (37.1%)                      |                |
| Lower                                                         | 14 (40.0%)                                 | 16 (45.7%)                      |                |
| Pretreatment Clinical Stage                                   |                                            |                                 | .198           |
| II                                                            | 1 (2.9%)                                   | 1 (2.9%)                        |                |
| III                                                           | 30 (85.7%)                                 | 24 (68.6%)                      |                |
| IVA                                                           | 4 (11.4%)                                  | 10 (28.6%)                      |                |
| Neoadjuvant Chemotherapy                                      |                                            |                                 | .792           |
| Carboplatin*/Paclitaxel                                       | 26 (74.3%)                                 | 24 (68.6%)                      |                |
| Cisplatin/5-FU                                                | 9 (25.7%)                                  | 11 (31.4%)                      |                |
| Number of Cycles of Neoadjuvant<br>Chemotherapy, Median (IQR) |                                            |                                 |                |
| Carboplatin*/Paclitaxel                                       | 6.0 (5.0 – 6.0)                            | 5.0 (4.3 – 6.0)                 | .545           |
| Cisplatin/5-FU                                                | 2.0 (2.0 – 2.5)                            | 2.0 (2.0 – 2.0)                 | 1.000          |
| Neoadjuvant RT dose, cGy                                      |                                            |                                 |                |
| Median (IQR)                                                  | 4500 (4500 - 4500)                         | 4500 (4140 - 4500)              | .607           |
| ypT classification, n (%)                                     |                                            |                                 | .093           |
| 0                                                             | 2 (5.7%)                                   | 5 (14.3%)                       |                |
| 1                                                             | 1 (2.9%)                                   | 4 (11.4%)                       |                |
| 2                                                             | 1 (2.9%)                                   | 4 (11.4%)                       |                |
| 3                                                             | 31 (88.6%)                                 | 22 (62.9%)                      |                |
| ypN classification, n (%)                                     |                                            |                                 | .296           |
| 0                                                             | 16 (45.7%)                                 | 19 (54.3%)                      |                |
| 1                                                             | 12 (34.3%)                                 | 14 (40.0%)                      |                |
| 2                                                             | 5 (14.3%)                                  | 2 (5.7%)                        |                |
| 3                                                             | 2 (5.7%)                                   | 0 (0.0%)                        |                |
| ypStage, n (%)                                                |                                            |                                 | .319           |
| II                                                            | 16 (45.7%)                                 | 19 (54.3%)                      |                |
| III                                                           | 17 (48.6%)                                 | 16 (45.7%)                      |                |
| IVA                                                           | 2 (5.7%)                                   | 0 (0.0%)                        |                |
| Resection margin, n (%)                                       |                                            |                                 | .342           |
| R0                                                            | 27 (77.1%)                                 | 31 (88.6%)                      |                |

|                                                                       |                  |              |      |
|-----------------------------------------------------------------------|------------------|--------------|------|
| R1                                                                    | 8 (22.9%)        | 4 (11.4%)    |      |
| Number of Lymph Nodes Resected                                        |                  |              | .811 |
| Median (IQR)                                                          | 25 (20 – 33)     | 23 (16 - 33) |      |
| Number of Positive Lymph Nodes                                        |                  |              | .633 |
| Median (IQR)                                                          | 1 (0 – 2)        | 1 (0 – 1)    |      |
| Mandard Tumor Regression Grade, n (%)                                 |                  |              | .603 |
| 1 – 2 (i.e., good pathologic response)                                | 9 (25.7%)        | 12 (34.3%)   |      |
| ≥ 3 (i.e., poor pathologic response)                                  | 26 (74.3%)       | 23 (65.7%)   |      |
| Adjuvant RT dose, cGy                                                 | Yes              | No           |      |
| Median (IQR)                                                          | 2000 (2000-2340) |              |      |
| Number of Cycles of adjuvant Chemotherapy <sup>#</sup> , Median (IQR) |                  |              |      |
| Carboplatin*/Paclitaxel                                               | 3.0 (2.3 – 4.0)  |              |      |
| Cisplatin/5-FU                                                        | 2.0 (1.0 – 2.0)  |              |      |

Abbreviations: CRT, chemoradiotherapy; RT, radiotherapy; 5-FU, 5-Fluorouracil; ECOG, Eastern Cooperative Oncology Group; IQR, interquartile range.

\*Carboplatin was replaced with Cisplatin in one patient each group.

<sup>#</sup>Adjuvant chemotherapy regimen was from Cisplatin/5-FU to Carboplatin/Paclitaxel in two patients and from Carboplatin/Paclitaxel to Cisplatin/5-FU in one patient.

**Supplemental Table S2.** Univariable Analysis of the Overall Population by Cox Proportional Hazard Regression

| Clinical Characteristics      | N  | OS                |         | RFS               |         |
|-------------------------------|----|-------------------|---------|-------------------|---------|
|                               |    | HR (95% CI)       | P-value | HR (95% CI)       | P-value |
| Age, years                    | 76 | 1.03 (1.00, 1.06) | .038    | 1.00 (0.96, 1.03) | .750    |
| ECOG Performance Status       |    |                   |         |                   |         |
| 0 (ref)                       | 11 |                   |         |                   |         |
| 1                             | 65 | 0.71 (0.34, 1.48) | .362    | 0.79 (0.37, 1.70) | .5439   |
| Tumor Location                |    |                   | .415    |                   | .737    |
| Upper Third (ref)             | 13 |                   |         |                   |         |
| Middle Third                  | 32 | 1.67 (0.71, 3.94) | .243    | 1.14 (0.51, 2.52) | .756    |
| Lower Third                   | 31 | 1.22 (0.52, 2.89) | .652    | 0.88 (0.39, 1.96) | .750    |
| Pretreatment Clinical Stage   |    |                   |         |                   |         |
| II and III (ref)              | 61 |                   |         |                   |         |
| IVA                           | 15 | 1.28 (0.65, 2.51) | .479    | 1.66 (0.85, 3.22) | .138    |
| Neoadjuvant Chemotherapy      |    |                   |         |                   |         |
| Carboplatin*/Paclitaxel (ref) | 55 |                   |         |                   |         |
| Cisplatin/5-FU                | 21 | 0.82 (0.43, 1.57) | .548    | 0.61 (0.30, 1.23) | .164    |

|                                |    |                   |      |                   |      |
|--------------------------------|----|-------------------|------|-------------------|------|
| Neoadjuvant RT dose            |    |                   |      |                   |      |
| <4500 cGy (ref)                | 18 |                   |      |                   |      |
| ≥4500 cGy                      | 58 | 0.68 (0.36, 1.26) | .222 | 0.80 (0.41, 1.54) | .501 |
| ypT Classification             |    |                   |      |                   |      |
| 0-2 (ref)                      | 22 |                   |      |                   |      |
| 3                              | 54 | 1.18 (0.61, 2.28) | .623 | 1.44 (0.71, 2.92) | .317 |
| ypN Classification             |    |                   |      |                   |      |
| 0 (ref)                        | 35 |                   |      |                   |      |
| 1                              | 31 | 0.90 (0.48, 1.71) | .753 | 0.90 (0.48, 1.68) | .742 |
| 2 and 3                        | 10 | 2.40 (1.04, 5.53) | .040 | 1.17 (0.44, 3.10) | .759 |
| ypStage                        |    |                   |      |                   |      |
| II (ref)                       | 35 |                   |      |                   |      |
| III - IVA                      | 41 | 1.12 (0.63, 2.00) | .712 | 0.95 (0.53, 1.70) | .855 |
| Resection Margin               |    |                   |      |                   |      |
| R0 (ref)                       | 64 |                   |      |                   |      |
| R1                             | 12 | 2.35 (1.15, 4.83) | .019 | 3.06 (1.52, 6.18) | .002 |
| No. of Lymph Nodes Resected    | 76 | 0.98 (0.95, 1.00) | .088 | 0.98 (0.95, 1.01) | .187 |
| No. of Positive Lymph Nodes    | 76 | 1.16 (1.02, 1.33) | .028 | 1.08 (0.93, 1.26) | .331 |
| Mandard Tumor Regression Grade |    |                   |      |                   |      |
| 1-2 (ref)                      | 25 |                   |      |                   |      |
| ≥3                             | 51 | 2.76 (1.34, 5.70) | .006 | 2.38 (1.18, 4.81) | .016 |
| Adjuvant Treatment             |    |                   |      |                   |      |
| Observation (ref)              | 41 |                   |      |                   |      |
| Consolidative CCRT             | 35 | 0.58 (0.32, 1.02) | .060 | 0.66 (0.37, 1.18) | .160 |

Abbreviations: HR, hazard ratio; OS, overall survival; RFS, recurrence free survival; ref, reference group; 95% CI, 95% confidence interval; RT, radiotherapy; CCRT, concurrent chemoradiotherapy.

\*Carboplatin was replaced with Cisplatin in one patient in each group.
